# Supplementary material
Source: publisher figshare collection journal article supplement (https://acs.figshare.com/ndownloader/files/4540054)
Supplement: Supplementary file 1 [file 4540054]

 
data_CuGa2(SeO3)4 
 
_audit_creation_method            SHELXL-97 
_chemical_name_systematic 
; 
 ? 
; 
_chemical_name_common             ? 
_chemical_melting_point           ? 
_chemical_formula_moiety          ? 
_chemical_formula_sum 
 'Cu Ga2 O14 Se4' 
_chemical_formula_weight          742.82 
 
loop_ 
 _atom_type_symbol 
 _atom_type_description 
 _atom_type_scat_dispersion_real 
 _atom_type_scat_dispersion_imag 
 _atom_type_scat_source 
 'O'  'O'   0.0106   0.0060 
 'International Tables Vol C Tables 4.2.6.8 and 6.1.1.4' 
 'Cu'  'Cu'   0.3201   1.2651 
 'International Tables Vol C Tables 4.2.6.8 and 6.1.1.4' 
 'Ga'  'Ga'   0.2307   1.6083 
 'International Tables Vol C Tables 4.2.6.8 and 6.1.1.4' 
 'Se'  'Se'  -0.0929   2.2259 
 'International Tables Vol C Tables 4.2.6.8 and 6.1.1.4' 
 
_symmetry_cell_setting            monoclinic  
_symmetry_space_group_name_H-M    P2(1)/c     
 
loop_ 
 _symmetry_equiv_pos_as_xyz 
 'x, y, z' 
 '-x, y+1/2, -z+1/2' 
 '-x, -y, -z' 
 'x, -y-1/2, z-1/2' 
 
_cell_length_a                    16.9757(15) 
_cell_length_b                    4.5881(2) 
_cell_length_c                    14.9023(12) 
_cell_angle_alpha                 90.00 
_cell_angle_beta                  115.493(3) 
_cell_angle_gamma                 90.00 
_cell_volume                      1047.68(13) 
_cell_formula_units_Z             4 
_cell_measurement_temperature     173(2) 
_cell_measurement_reflns_used     ? 
_cell_measurement_theta_min       2.4073   
_cell_measurement_theta_max       27.4835  
 
_exptl_crystal_description        Rod  
_exptl_crystal_colour             blue 
_exptl_crystal_size_max           0.2  
_exptl_crystal_size_mid           0.05 
_exptl_crystal_size_min           0.03 
_exptl_crystal_density_meas       ? 
_exptl_crystal_density_diffrn     4.709 
_exptl_crystal_density_method     'not measured' 
_exptl_crystal_F_000              1356 
_exptl_absorpt_coefficient_mu     21.104 
_exptl_absorpt_correction_type    Multi-scan 
_exptl_absorpt_correction_T_min   0.03       
_exptl_absorpt_correction_T_max   0.33       
_exptl_absorpt_process_details    ? 
 
_exptl_special_details 
; 
 ? 
; 
 
_diffrn_ambient_temperature       173(2) 
_diffrn_radiation_wavelength      0.71073 
_diffrn_radiation_type            MoK\a 
_diffrn_radiation_source          'fine-focus sealed tube' 
_diffrn_radiation_monochromator   graphite 
_diffrn_measurement_device_type   mercury70           
_diffrn_measurement_method        CCD_Profile_fitting 
_diffrn_detector_area_resol_mean  ? 
_diffrn_standards_number          ? 
_diffrn_standards_interval_count  ? 
_diffrn_standards_interval_time   ? 
_diffrn_standards_decay_%         ? 
_diffrn_reflns_number             7478 
_diffrn_reflns_av_R_equivalents   0.0306 
_diffrn_reflns_av_sigmaI/netI     0.0313 
_diffrn_reflns_limit_h_min        -22 
_diffrn_reflns_limit_h_max        20 
_diffrn_reflns_limit_k_min        -5 
_diffrn_reflns_limit_k_max        5 
_diffrn_reflns_limit_l_min        -19 
_diffrn_reflns_limit_l_max        19 
_diffrn_reflns_theta_min          2.73 
_diffrn_reflns_theta_max          27.48 
_reflns_number_total              2387 
_reflns_number_gt                 2131 
_reflns_threshold_expression      >2sigma(I) 
 
_computing_data_collection        ? 
_computing_cell_refinement        ? 
_computing_data_reduction         ? 
_computing_structure_solution     'SHELXS-97 (Sheldrick, 1990)' 
_computing_structure_refinement   'SHELXL-97 (Sheldrick, 1997)' 
_computing_molecular_graphics     ? 
_computing_publication_material   ? 
 
_refine_special_details 
; 
 Refinement of F^2^ against ALL reflections.  The weighted R-factor wR and 
 goodness of fit S are based on F^2^, conventional R-factors R are based 
 on F, with F set to zero for negative F^2^. The threshold expression of 
 F^2^ > 2sigma(F^2^) is used only for calculating R-factors(gt) etc. and is 
 not relevant to the choice of reflections for refinement.  R-factors based 
 on F^2^ are statistically about twice as large as those based on F, and R- 
 factors based on ALL data will be even larger. 
; 
 
_refine_ls_structure_factor_coef  Fsqd  
_refine_ls_matrix_type            full 
_refine_ls_weighting_scheme       calc  
_refine_ls_weighting_details 
 'calc w=1/[\s^2^(Fo^2^)+(0.0390P)^2^+5.2546P] where P=(Fo^2^+2Fc^2^)/3' 
_atom_sites_solution_primary      direct 
_atom_sites_solution_secondary    difmap 
_refine_ls_extinction_method      none 
_refine_ls_extinction_coef        ? 
_refine_ls_number_reflns          2387 
_refine_ls_number_parameters      175 
_refine_ls_number_restraints      0 
_refine_ls_R_factor_all           0.0345 
_refine_ls_R_factor_gt            0.0278 
_refine_ls_wR_factor_ref          0.0686 
_refine_ls_wR_factor_gt           0.0639 
_refine_ls_goodness_of_fit_ref    0.940 
_refine_ls_restrained_S_all       0.940 
_refine_ls_shift/su_max           0.001 
_refine_ls_shift/su_mean          0.000 
 
loop_ 
 _atom_site_label 
 _atom_site_type_symbol 
 _atom_site_fract_x 
 _atom_site_fract_y 
 _atom_site_fract_z 
 _atom_site_U_iso_or_equiv 
 _atom_site_adp_type 
 _atom_site_occupancy 
 _atom_site_symmetry_multiplicity 
 _atom_site_calc_flag 
 _atom_site_refinement_flags 
 _atom_site_disorder_assembly 
 _atom_site_disorder_group 
Ga1 Ga 0.57929(4) 0.92258(12) 0.22742(4) 0.00934(13) Uani 1 1 d . . . 
Ga2 Ga 0.08133(4) 0.90366(12) -0.15007(4) 0.00943(13) Uani 1 1 d . . . 
Cu1 Cu 0.5000 0.5000 0.0000 0.01110(19) Uani 1 2 d S . . 
Cu2 Cu 0.0000 1.0000 -0.5000 0.01131(19) Uani 1 2 d S . . 
Se1 Se 0.39333(3) 0.89275(11) 0.09915(4) 0.00911(12) Uani 1 1 d . . . 
Se2 Se 0.67874(3) 0.44137(12) 0.15994(4) 0.01060(12) Uani 1 1 d . . . 
Se3 Se 0.10544(3) 1.37289(11) -0.29746(4) 0.00928(12) Uani 1 1 d . . . 
Se4 Se 0.17955(3) 0.41839(11) 0.01471(4) 0.01029(12) Uani 1 1 d . . . 
O1 O 0.4878(2) 0.7522(8) 0.1002(3) 0.0126(8) Uani 1 1 d . . . 
O2 O 0.3579(2) 0.6276(8) 0.1499(3) 0.0115(7) Uani 1 1 d . . . 
O3 O 0.4580(2) 1.1057(8) 0.1998(3) 0.0117(8) Uani 1 1 d . . . 
O4 O 0.6774(3) 0.6940(8) 0.2432(3) 0.0143(8) Uani 1 1 d . . . 
O5 O 0.5935(2) 0.2166(8) 0.1440(3) 0.0143(8) Uani 1 1 d . . . 
O6 O 0.6255(3) 0.6002(8) 0.0477(3) 0.0149(8) Uani 1 1 d . . . 
O7 O 0.0431(2) 1.5842(8) -0.2570(3) 0.0115(8) Uani 1 1 d . . . 
O8 O 0.1430(2) 1.1058(8) -0.2127(3) 0.0127(8) Uani 1 1 d . . . 
O9 O 0.0096(2) 1.2350(8) -0.3873(3) 0.0119(8) Uani 1 1 d . . . 
O10 O 0.0926(3) 0.2067(8) -0.0567(3) 0.0146(8) Uani 1 1 d . . . 
O11 O 0.1809(2) 0.6820(8) -0.0652(3) 0.0119(7) Uani 1 1 d . . . 
O12 O 0.1276(3) 0.5799(8) 0.0754(3) 0.0146(8) Uani 1 1 d . . . 
 
loop_ 
 _atom_site_aniso_label 
 _atom_site_aniso_U_11 
 _atom_site_aniso_U_22 
 _atom_site_aniso_U_33 
 _atom_site_aniso_U_23 
 _atom_site_aniso_U_13 
 _atom_site_aniso_U_12 
Ga1 0.0108(3) 0.0079(3) 0.0088(3) -0.0006(2) 0.0037(2) -0.0005(2) 
Ga2 0.0105(3) 0.0085(3) 0.0090(3) -0.0004(2) 0.0039(2) -0.0009(2) 
Cu1 0.0118(4) 0.0130(5) 0.0088(4) -0.0040(4) 0.0047(4) -0.0017(4) 
Cu2 0.0115(4) 0.0130(5) 0.0088(4) -0.0029(4) 0.0038(4) 0.0010(4) 
Se1 0.0097(2) 0.0085(3) 0.0084(2) 0.00119(19) 0.0032(2) -0.00015(19) 
Se2 0.0097(2) 0.0119(3) 0.0103(2) -0.00095(19) 0.0045(2) 0.00066(19) 
Se3 0.0096(2) 0.0092(3) 0.0089(2) 0.00047(19) 0.0039(2) -0.0003(2) 
Se4 0.0096(2) 0.0105(3) 0.0094(2) 0.00139(19) 0.0028(2) -0.0002(2) 
O1 0.0128(18) 0.0115(19) 0.0122(17) -0.0029(15) 0.0041(15) -0.0004(16) 
O2 0.0105(18) 0.0127(19) 0.0106(17) 0.0016(15) 0.0039(15) -0.0022(15) 
O3 0.0126(18) 0.0106(18) 0.0118(17) -0.0021(15) 0.0053(15) -0.0002(15) 
O4 0.0160(19) 0.0142(19) 0.0147(18) -0.0028(16) 0.0085(16) 0.0004(16) 
O5 0.0165(19) 0.0119(19) 0.0133(18) 0.0025(15) 0.0052(16) -0.0031(16) 
O6 0.0165(19) 0.017(2) 0.0109(17) 0.0008(15) 0.0055(16) -0.0014(16) 
O7 0.0121(18) 0.0095(19) 0.0110(17) -0.0054(14) 0.0033(15) -0.0011(15) 
O8 0.0127(18) 0.0129(19) 0.0122(18) 0.0026(15) 0.0048(16) 0.0007(15) 
O9 0.0085(17) 0.018(2) 0.0099(17) -0.0042(15) 0.0041(14) -0.0011(15) 
O10 0.0158(19) 0.0125(19) 0.0154(18) -0.0039(16) 0.0067(16) -0.0006(16) 
O11 0.0114(18) 0.0096(18) 0.0174(18) 0.0031(15) 0.0088(15) 0.0010(15) 
O12 0.0159(19) 0.017(2) 0.0129(18) -0.0019(16) 0.0079(16) 0.0008(16) 
 
_geom_special_details 
; 
 All esds (except the esd in the dihedral angle between two l.s. planes) 
 are estimated using the full covariance matrix.  The cell esds are taken 
 into account individually in the estimation of esds in distances, angles 
 and torsion angles; correlations between esds in cell parameters are only 
 used when they are defined by crystal symmetry.  An approximate (isotropic) 
 treatment of cell esds is used for estimating esds involving l.s. planes. 
; 
 
loop_ 
 _geom_bond_atom_site_label_1 
 _geom_bond_atom_site_label_2 
 _geom_bond_distance 
 _geom_bond_site_symmetry_2 
 _geom_bond_publ_flag 
Ga1 O4 1.895(4) . ? 
Ga1 O5 1.919(4) 1_565 ? 
Ga1 O2 1.920(4) 2_655 ? 
Ga1 O1 2.021(4) . ? 
Ga1 O3 2.069(4) 2_645 ? 
Ga1 O3 2.095(4) . ? 
Ga2 O11 1.911(4) . ? 
Ga2 O8 1.916(4) . ? 
Ga2 O10 1.918(4) 1_565 ? 
Ga2 O9 2.007(4) 2_544 ? 
Ga2 O7 2.054(3) 1_545 ? 
Ga2 O7 2.133(4) 2_544 ? 
Ga2 Se3 2.9240(8) 2_544 ? 
Cu1 O1 1.969(4) 3_665 ? 
Cu1 O1 1.969(4) . ? 
Cu1 O6 1.988(4) 3_665 ? 
Cu1 O6 1.988(4) . ? 
Cu1 O5 2.425(4) . ? 
Cu1 O5 2.425(4) 3_665 ? 
Cu2 O9 1.943(3) . ? 
Cu2 O9 1.943(3) 3_574 ? 
Cu2 O12 1.998(4) 4_575 ? 
Cu2 O12 1.998(4) 2_554 ? 
Cu2 O10 2.477(4) 4_575 ? 
Cu2 O10 2.477(4) 2_554 ? 
Se1 O2 1.675(4) . ? 
Se1 O1 1.722(4) . ? 
Se1 O3 1.730(4) . ? 
Se2 O6 1.687(4) . ? 
Se2 O4 1.706(4) . ? 
Se2 O5 1.708(4) . ? 
Se3 O8 1.676(4) . ? 
Se3 O9 1.722(4) . ? 
Se3 O7 1.724(4) . ? 
Se3 Ga2 2.9240(8) 2_554 ? 
Se4 O12 1.684(4) . ? 
Se4 O10 1.704(4) . ? 
Se4 O11 1.705(4) . ? 
O2 Ga1 1.920(4) 2_645 ? 
O3 Ga1 2.069(4) 2_655 ? 
O5 Ga1 1.919(4) 1_545 ? 
O7 Ga2 2.054(3) 1_565 ? 
O7 Ga2 2.133(4) 2_554 ? 
O9 Ga2 2.007(4) 2_554 ? 
O10 Ga2 1.918(4) 1_545 ? 
O12 Cu2 1.998(4) 2_544 ? 
 
loop_ 
 _geom_angle_atom_site_label_1 
 _geom_angle_atom_site_label_2 
 _geom_angle_atom_site_label_3 
 _geom_angle 
 _geom_angle_site_symmetry_1 
 _geom_angle_site_symmetry_3 
 _geom_angle_publ_flag 
O4 Ga1 O5 96.93(17) . 1_565 ? 
O4 Ga1 O2 93.11(16) . 2_655 ? 
O5 Ga1 O2 95.71(16) 1_565 2_655 ? 
O4 Ga1 O1 100.51(16) . . ? 
O5 Ga1 O1 85.65(16) 1_565 . ? 
O2 Ga1 O1 166.05(15) 2_655 . ? 
O4 Ga1 O3 89.81(16) . 2_645 ? 
O5 Ga1 O3 170.31(16) 1_565 2_645 ? 
O2 Ga1 O3 90.85(15) 2_655 2_645 ? 
O1 Ga1 O3 86.28(15) . 2_645 ? 
O4 Ga1 O3 169.62(16) . . ? 
O5 Ga1 O3 88.73(16) 1_565 . ? 
O2 Ga1 O3 94.98(15) 2_655 . ? 
O1 Ga1 O3 71.15(15) . . ? 
O3 Ga1 O3 83.59(9) 2_645 . ? 
O11 Ga2 O8 93.80(15) . . ? 
O11 Ga2 O10 97.02(16) . 1_565 ? 
O8 Ga2 O10 95.64(16) . 1_565 ? 
O11 Ga2 O9 100.28(15) . 2_544 ? 
O8 Ga2 O9 165.58(15) . 2_544 ? 
O10 Ga2 O9 85.79(16) 1_565 2_544 ? 
O11 Ga2 O7 91.58(15) . 1_545 ? 
O8 Ga2 O7 91.35(15) . 1_545 ? 
O10 Ga2 O7 168.52(16) 1_565 1_545 ? 
O9 Ga2 O7 85.20(15) 2_544 1_545 ? 
O11 Ga2 O7 169.55(15) . 2_544 ? 
O8 Ga2 O7 95.30(15) . 2_544 ? 
O10 Ga2 O7 87.19(15) 1_565 2_544 ? 
O9 Ga2 O7 70.41(14) 2_544 2_544 ? 
O7 Ga2 O7 83.09(9) 1_545 2_544 ? 
O11 Ga2 Se3 134.44(11) . 2_544 ? 
O8 Ga2 Se3 130.57(11) . 2_544 ? 
O10 Ga2 Se3 89.25(12) 1_565 2_544 ? 
O9 Ga2 Se3 35.01(10) 2_544 2_544 ? 
O7 Ga2 Se3 79.29(11) 1_545 2_544 ? 
O7 Ga2 Se3 35.70(10) 2_544 2_544 ? 
O1 Cu1 O1 180.0(3) 3_665 . ? 
O1 Cu1 O6 92.28(15) 3_665 3_665 ? 
O1 Cu1 O6 87.72(15) . 3_665 ? 
O1 Cu1 O6 87.72(15) 3_665 . ? 
O1 Cu1 O6 92.28(15) . . ? 
O6 Cu1 O6 180.00(10) 3_665 . ? 
O1 Cu1 O5 96.50(14) 3_665 . ? 
O1 Cu1 O5 83.50(14) . . ? 
O6 Cu1 O5 112.63(14) 3_665 . ? 
O6 Cu1 O5 67.37(14) . . ? 
O1 Cu1 O5 83.50(14) 3_665 3_665 ? 
O1 Cu1 O5 96.50(14) . 3_665 ? 
O6 Cu1 O5 67.37(14) 3_665 3_665 ? 
O6 Cu1 O5 112.63(14) . 3_665 ? 
O5 Cu1 O5 180.0 . 3_665 ? 
O9 Cu2 O9 180.0(2) . 3_574 ? 
O9 Cu2 O12 87.04(15) . 4_575 ? 
O9 Cu2 O12 92.96(15) 3_574 4_575 ? 
O9 Cu2 O12 92.96(15) . 2_554 ? 
O9 Cu2 O12 87.04(15) 3_574 2_554 ? 
O12 Cu2 O12 180.00(13) 4_575 2_554 ? 
O9 Cu2 O10 99.44(14) . 4_575 ? 
O9 Cu2 O10 80.56(14) 3_574 4_575 ? 
O12 Cu2 O10 66.33(14) 4_575 4_575 ? 
O12 Cu2 O10 113.67(14) 2_554 4_575 ? 
O9 Cu2 O10 80.56(14) . 2_554 ? 
O9 Cu2 O10 99.44(14) 3_574 2_554 ? 
O12 Cu2 O10 113.67(14) 4_575 2_554 ? 
O12 Cu2 O10 66.33(14) 2_554 2_554 ? 
O10 Cu2 O10 180.00(12) 4_575 2_554 ? 
O2 Se1 O1 103.77(18) . . ? 
O2 Se1 O3 103.65(17) . . ? 
O1 Se1 O3 87.89(17) . . ? 
O6 Se2 O4 105.02(18) . . ? 
O6 Se2 O5 93.57(18) . . ? 
O4 Se2 O5 103.66(18) . . ? 
O8 Se3 O9 104.05(18) . . ? 
O8 Se3 O7 103.87(18) . . ? 
O9 Se3 O7 87.78(17) . . ? 
O8 Se3 Ga2 104.72(13) . 2_554 ? 
O9 Se3 Ga2 41.98(12) . 2_554 ? 
O7 Se3 Ga2 46.23(12) . 2_554 ? 
O12 Se4 O10 94.16(18) . . ? 
O12 Se4 O11 103.37(18) . . ? 
O10 Se4 O11 103.71(18) . . ? 
Se1 O1 Cu1 128.0(2) . . ? 
Se1 O1 Ga1 101.56(17) . . ? 
Cu1 O1 Ga1 130.48(19) . . ? 
Se1 O2 Ga1 128.7(2) . 2_645 ? 
Se1 O3 Ga1 128.9(2) . 2_655 ? 
Se1 O3 Ga1 98.45(16) . . ? 
Ga1 O3 Ga1 132.49(19) 2_655 . ? 
Se2 O4 Ga1 124.9(2) . . ? 
Se2 O5 Ga1 132.0(2) . 1_545 ? 
Se2 O5 Cu1 89.56(15) . . ? 
Ga1 O5 Cu1 137.16(19) 1_545 . ? 
Se2 O6 Cu1 106.79(19) . . ? 
Se3 O7 Ga2 129.5(2) . 1_565 ? 
Se3 O7 Ga2 98.07(16) . 2_554 ? 
Ga2 O7 Ga2 132.42(19) 1_565 2_554 ? 
Se3 O8 Ga2 127.6(2) . . ? 
Se3 O9 Cu2 125.1(2) . . ? 
Se3 O9 Ga2 103.01(17) . 2_554 ? 
Cu2 O9 Ga2 131.71(19) . 2_554 ? 
Se4 O10 Ga2 130.9(2) . 1_545 ? 
Se4 O11 Ga2 124.4(2) . . ? 
Se4 O12 Cu2 107.99(19) . 2_544 ? 
 
_diffrn_measured_fraction_theta_max    0.999 
_diffrn_reflns_theta_full              27.48 
_diffrn_measured_fraction_theta_full   0.999 
_refine_diff_density_max    0.872 
_refine_diff_density_min   -1.027 
_refine_diff_density_rms    0.190 

#===end

data_CuGa2Se3O10 
 
_audit_creation_method            SHELXL-97 
_chemical_name_systematic 
; 
 ? 
; 
_chemical_name_common             ? 
_chemical_melting_point           ? 
_chemical_formula_moiety          ? 
_chemical_formula_sum 
 'Cu Ga2 O10 Se3' 
_chemical_formula_weight          599.86 
 
loop_ 
 _atom_type_symbol 
 _atom_type_description 
 _atom_type_scat_dispersion_real 
 _atom_type_scat_dispersion_imag 
 _atom_type_scat_source 
 'O'  'O'   0.0106   0.0060 
 'International Tables Vol C Tables 4.2.6.8 and 6.1.1.4' 
 'Cu'  'Cu'   0.3201   1.2651 
 'International Tables Vol C Tables 4.2.6.8 and 6.1.1.4' 
 'Ga'  'Ga'   0.2307   1.6083 
 'International Tables Vol C Tables 4.2.6.8 and 6.1.1.4' 
 'Se'  'Se'  -0.0929   2.2259 
 'International Tables Vol C Tables 4.2.6.8 and 6.1.1.4' 
 
_symmetry_cell_setting            orthorhombic 
_symmetry_space_group_name_H-M    Pmna 
 
loop_ 
 _symmetry_equiv_pos_as_xyz 
 'x, y, z' 
 '-x+1/2, -y, z+1/2' 
 'x, -y, -z' 
 '-x+1/2, y, -z+1/2' 
 '-x, -y, -z' 
 'x-1/2, y, -z-1/2' 
 '-x, y, z' 
 'x-1/2, -y, z-1/2' 
 
_cell_length_a                    6.495(2) 
_cell_length_b                    9.598(3) 
_cell_length_c                    13.443(5) 
_cell_angle_alpha                 90.00 
_cell_angle_beta                  90.00 
_cell_angle_gamma                 90.00 
_cell_volume                      838.0(5) 
_cell_formula_units_Z             4 
_cell_measurement_temperature     173(2) 
_cell_measurement_reflns_used     ? 
_cell_measurement_theta_min       2.1218  
_cell_measurement_theta_max       27.4758 
 
_exptl_crystal_description        rod 
_exptl_crystal_colour             green 
_exptl_crystal_size_max           0.26 
_exptl_crystal_size_mid           0.05 
_exptl_crystal_size_min           0.03 
_exptl_crystal_density_meas       ? 
_exptl_crystal_density_diffrn     4.755 
_exptl_crystal_density_method     'not measured' 
_exptl_crystal_F_000              1092 
_exptl_absorpt_coefficient_mu     21.973 
_exptl_absorpt_correction_type    Multi-scan 
_exptl_absorpt_correction_T_min   0.5192  
_exptl_absorpt_correction_T_max   1.0000
_exptl_absorpt_process_details    ? 
 
_exptl_special_details 
; 
 ? 
; 
 
_diffrn_ambient_temperature       173(2) 
_diffrn_radiation_wavelength      0.71073 
_diffrn_radiation_type            MoK\a 
_diffrn_radiation_source          'fine-focus sealed tube' 
_diffrn_radiation_monochromator   graphite 
_diffrn_measurement_device_type   Saturn70 
_diffrn_measurement_method        CCD_Profile_fitting 
_diffrn_detector_area_resol_mean  ? 
_diffrn_standards_number          ? 
_diffrn_standards_interval_count  ? 
_diffrn_standards_interval_time   ? 
_diffrn_standards_decay_%         ? 
_diffrn_reflns_number             6171 
_diffrn_reflns_av_R_equivalents   0.0343 
_diffrn_reflns_av_sigmaI/netI     0.0233 
_diffrn_reflns_limit_h_min        -8 
_diffrn_reflns_limit_h_max        8 
_diffrn_reflns_limit_k_min        -12 
_diffrn_reflns_limit_k_max        12 
_diffrn_reflns_limit_l_min        -17 
_diffrn_reflns_limit_l_max        14 
_diffrn_reflns_theta_min          2.12 
_diffrn_reflns_theta_max          27.47 
_reflns_number_total              1042 
_reflns_number_gt                 900 
_reflns_threshold_expression      >2sigma(I) 
 
_computing_data_collection        ? 
_computing_cell_refinement        ? 
_computing_data_reduction         ? 
_computing_structure_solution     'SHELXS-97 (Sheldrick, 1990)' 
_computing_structure_refinement   'SHELXL-97 (Sheldrick, 1997)' 
_computing_molecular_graphics     ? 
_computing_publication_material   ? 
 
_refine_special_details 
; 
 Refinement of F^2^ against ALL reflections.  The weighted R-factor wR and 
 goodness of fit S are based on F^2^, conventional R-factors R are based 
 on F, with F set to zero for negative F^2^. The threshold expression of 
 F^2^ > 2sigma(F^2^) is used only for calculating R-factors(gt) etc. and is 
 not relevant to the choice of reflections for refinement.  R-factors based 
 on F^2^ are statistically about twice as large as those based on F, and R- 
 factors based on ALL data will be even larger. 
; 
 
_refine_ls_structure_factor_coef  Fsqd  
_refine_ls_matrix_type            full 
_refine_ls_weighting_scheme       calc  
_refine_ls_weighting_details 
 'calc w=1/[\s^2^(Fo^2^)+(0.0394P)^2^+0.0000P] where P=(Fo^2^+2Fc^2^)/3' 
_atom_sites_solution_primary      direct 
_atom_sites_solution_secondary    difmap 
_refine_ls_extinction_method      none 
_refine_ls_extinction_coef        ? 
_refine_ls_number_reflns          1042 
_refine_ls_number_parameters      86 
_refine_ls_number_restraints      0 
_refine_ls_R_factor_all           0.0256 
_refine_ls_R_factor_gt            0.0213 
_refine_ls_wR_factor_ref          0.0604 
_refine_ls_wR_factor_gt           0.0583 
_refine_ls_goodness_of_fit_ref    1.046 
_refine_ls_restrained_S_all       1.046 
_refine_ls_shift/su_max           0.000 
_refine_ls_shift/su_mean          0.000 
 
loop_ 
 _atom_site_label 
 _atom_site_type_symbol 
 _atom_site_fract_x 
 _atom_site_fract_y 
 _atom_site_fract_z 
 _atom_site_U_iso_or_equiv 
 _atom_site_adp_type 
 _atom_site_occupancy 
 _atom_site_symmetry_multiplicity 
 _atom_site_calc_flag 
 _atom_site_refinement_flags 
 _atom_site_disorder_assembly 
 _atom_site_disorder_group 
Ga1 Ga 0.2500 0.21097(7) 0.2500 0.02024(17) Uani 1 2 d S . . 
Ga2 Ga 0.0000 0.00337(7) 0.38092(5) 0.02323(18) Uani 1 2 d S . . 
Cu Cu 0.2500 0.67147(6) 0.2500 0.01353(16) Uani 1 2 d S . . 
Se1 Se 0.0000 0.44065(5) 0.12194(4) 0.01587(15) Uani 1 2 d S . . 
Se2 Se 0.0000 0.90617(5) 0.11980(4) 0.01576(15) Uani 1 2 d S . . 
Se3 Se 0.0000 0.68914(5) 0.46647(4) 0.01286(14) Uani 1 2 d S . . 
O1 O 0.0000 0.1538(3) 0.2932(3) 0.0131(7) Uani 1 2 d S . . 
O2 O 0.2028(4) 0.3364(3) 0.1429(2) 0.0208(6) Uani 1 1 d . . . 
O3 O 0.0000 0.5422(4) 0.2287(3) 0.0239(9) Uani 1 2 d S . . 
O4 O 0.0000 0.8270(4) 0.2361(4) 0.0380(13) Uani 1 2 d S . . 
O5 O 0.1975(4) 1.0181(3) 0.1323(2) 0.0245(7) Uani 1 1 d . . . 
O6 O 0.2077(4) 0.6707(3) 0.3914(2) 0.0182(6) Uani 1 1 d . . . 
O7 O 0.0000 0.8666(4) 0.4824(3) 0.0179(8) Uani 1 2 d S . . 
 
loop_ 
 _atom_site_aniso_label 
 _atom_site_aniso_U_11 
 _atom_site_aniso_U_22 
 _atom_site_aniso_U_33 
 _atom_site_aniso_U_23 
 _atom_site_aniso_U_13 
 _atom_site_aniso_U_12 
Ga1 0.0076(3) 0.0376(4) 0.0155(3) 0.000 0.0018(2) 0.000 
Ga2 0.0180(3) 0.0234(3) 0.0283(4) 0.0140(3) 0.000 0.000 
Cu 0.0070(3) 0.0210(3) 0.0127(3) 0.000 0.0004(2) 0.000 
Se1 0.0251(3) 0.0129(3) 0.0096(3) 0.00223(19) 0.000 0.000 
Se2 0.0129(3) 0.0132(3) 0.0212(3) 0.0065(2) 0.000 0.000 
Se3 0.0120(3) 0.0127(2) 0.0139(3) 0.00229(19) 0.000 0.000 
O1 0.0128(17) 0.0114(16) 0.0152(19) 0.0033(14) 0.000 0.000 
O2 0.0147(14) 0.0295(15) 0.0182(15) 0.0060(12) 0.0022(12) 0.0021(11) 
O3 0.038(2) 0.0218(19) 0.0118(19) -0.0034(16) 0.000 0.000 
O4 0.039(3) 0.041(3) 0.034(3) 0.028(2) 0.000 0.000 
O5 0.0150(14) 0.0175(13) 0.0411(19) -0.0012(12) 0.0096(14) -0.0021(12) 
O6 0.0125(13) 0.0266(14) 0.0156(14) -0.0014(11) 0.0000(11) 0.0023(11) 
O7 0.024(2) 0.0096(17) 0.020(2) 0.0046(15) 0.000 0.000 
 
_geom_special_details 
; 
 All esds (except the esd in the dihedral angle between two l.s. planes) 
 are estimated using the full covariance matrix.  The cell esds are taken 
 into account individually in the estimation of esds in distances, angles 
 and torsion angles; correlations between esds in cell parameters are only 
 used when they are defined by crystal symmetry.  An approximate (isotropic) 
 treatment of cell esds is used for estimating esds involving l.s. planes. 
; 
 
loop_ 
 _geom_bond_atom_site_label_1 
 _geom_bond_atom_site_label_2 
 _geom_bond_distance 
 _geom_bond_site_symmetry_2 
 _geom_bond_publ_flag 
Ga1 O1 1.8095(17) 6_656 ? 
Ga1 O1 1.8095(16) . ? 
Ga1 O2 1.902(3) 4 ? 
Ga1 O2 1.902(3) . ? 
Ga2 O1 1.864(4) . ? 
Ga2 O7 1.893(4) 1_545 ? 
Ga2 O5 1.978(3) 4_545 ? 
Ga2 O5 1.978(3) 6_546 ? 
Ga2 O7 2.222(4) 5_566 ? 
Cu O6 1.921(3) 4 ? 
Cu O6 1.921(3) . ? 
Cu O3 2.063(2) . ? 
Cu O3 2.063(2) 6_656 ? 
Cu O4 2.214(3) 6_656 ? 
Cu O4 2.214(3) . ? 
Se1 O2 1.678(3) 7 ? 
Se1 O2 1.678(3) . ? 
Se1 O3 1.735(4) . ? 
Se2 O5 1.681(3) . ? 
Se2 O5 1.681(3) 7 ? 
Se2 O4 1.738(4) . ? 
Se3 O6 1.694(3) 7 ? 
Se3 O6 1.694(3) . ? 
Se3 O7 1.717(4) . ? 
O1 Ga1 1.8095(16) 6_556 ? 
O3 Cu 2.063(2) 6_556 ? 
O4 Cu 2.214(3) 6_556 ? 
O5 Ga2 1.978(3) 6_666 ? 
O7 Ga2 1.893(4) 1_565 ? 
O7 Ga2 2.222(4) 5_566 ? 
 
loop_ 
 _geom_angle_atom_site_label_1 
 _geom_angle_atom_site_label_2 
 _geom_angle_atom_site_label_3 
 _geom_angle 
 _geom_angle_site_symmetry_1 
 _geom_angle_site_symmetry_3 
 _geom_angle_publ_flag 
O1 Ga1 O1 144.7(2) 6_656 . ? 
O1 Ga1 O2 106.87(13) 6_656 4 ? 
O1 Ga1 O2 95.36(14) . 4 ? 
O1 Ga1 O2 95.36(14) 6_656 . ? 
O1 Ga1 O2 106.87(13) . . ? 
O2 Ga1 O2 101.46(17) 4 . ? 
O1 Ga2 O7 173.14(16) . 1_545 ? 
O1 Ga2 O5 83.56(8) . 4_545 ? 
O7 Ga2 O5 96.56(9) 1_545 4_545 ? 
O1 Ga2 O5 83.56(8) . 6_546 ? 
O7 Ga2 O5 96.56(9) 1_545 6_546 ? 
O5 Ga2 O5 166.82(17) 4_545 6_546 ? 
O1 Ga2 O7 95.06(15) . 5_566 ? 
O7 Ga2 O7 78.08(16) 1_545 5_566 ? 
O5 Ga2 O7 91.97(9) 4_545 5_566 ? 
O5 Ga2 O7 91.97(9) 6_546 5_566 ? 
O6 Cu O6 179.55(15) 4 . ? 
O6 Cu O3 88.45(13) 4 . ? 
O6 Cu O3 91.28(13) . . ? 
O6 Cu O3 91.28(13) 4 6_656 ? 
O6 Cu O3 88.45(13) . 6_656 ? 
O3 Cu O3 106.07(17) . 6_656 ? 
O6 Cu O4 88.93(15) 4 6_656 ? 
O6 Cu O4 91.37(15) . 6_656 ? 
O3 Cu O4 173.96(14) . 6_656 ? 
O3 Cu O4 79.43(13) 6_656 6_656 ? 
O6 Cu O4 91.37(15) 4 . ? 
O6 Cu O4 88.93(15) . . ? 
O3 Cu O4 79.43(13) . . ? 
O3 Cu O4 173.96(14) 6_656 . ? 
O4 Cu O4 95.19(17) 6_656 . ? 
O2 Se1 O2 103.44(18) 7 . ? 
O2 Se1 O3 101.31(12) 7 . ? 
O2 Se1 O3 101.31(12) . . ? 
O5 Se2 O5 99.43(18) . 7 ? 
O5 Se2 O4 100.91(14) . . ? 
O5 Se2 O4 100.91(14) 7 . ? 
O6 Se3 O6 105.55(19) 7 . ? 
O6 Se3 O7 100.25(11) 7 . ? 
O6 Se3 O7 100.25(12) . . ? 
Ga1 O1 Ga1 127.6(2) 6_556 . ? 
Ga1 O1 Ga2 115.96(10) 6_556 . ? 
Ga1 O1 Ga2 115.96(10) . . ? 
Se1 O2 Ga1 129.13(16) . . ? 
Se1 O3 Cu 116.91(13) . . ? 
Se1 O3 Cu 116.91(13) . 6_556 ? 
Cu O3 Cu 103.79(16) . 6_556 ? 
Se2 O4 Cu 111.77(18) . 6_556 ? 
Se2 O4 Cu 111.77(18) . . ? 
Cu O4 Cu 94.37(16) 6_556 . ? 
Se2 O5 Ga2 134.68(16) . 6_666 ? 
Se3 O6 Cu 134.69(16) . . ? 
Se3 O7 Ga2 126.8(2) . 1_565 ? 
Se3 O7 Ga2 131.3(2) . 5_566 ? 
Ga2 O7 Ga2 101.92(16) 1_565 5_566 ? 
 
_diffrn_measured_fraction_theta_max    0.993 
_diffrn_reflns_theta_full              27.47 
_diffrn_measured_fraction_theta_full   0.993 
_refine_diff_density_max    1.913 
_refine_diff_density_min   -1.139 
_refine_diff_density_rms    0.157 

#===end

 
data_Cu3Ga2Se6O18 
 
_audit_creation_method            SHELXL-97 
_chemical_name_systematic 
; 
 ? 
; 
_chemical_name_common             ? 
_chemical_melting_point           ? 
_chemical_formula_moiety          ? 
_chemical_formula_sum 
 'Cu3 Ga2 O18 Se6' 
_chemical_formula_weight          1091.82 
 
loop_ 
 _atom_type_symbol 
 _atom_type_description 
 _atom_type_scat_dispersion_real 
 _atom_type_scat_dispersion_imag 
 _atom_type_scat_source 
 'O'  'O'   0.0106   0.0060 
 'International Tables Vol C Tables 4.2.6.8 and 6.1.1.4' 
 'Cu'  'Cu'   0.3201   1.2651 
 'International Tables Vol C Tables 4.2.6.8 and 6.1.1.4' 
 'Ga'  'Ga'   0.2307   1.6083 
 'International Tables Vol C Tables 4.2.6.8 and 6.1.1.4' 
 'Se'  'Se'  -0.0929   2.2259 
 'International Tables Vol C Tables 4.2.6.8 and 6.1.1.4' 
 
_symmetry_cell_setting            monoclinic 
_symmetry_space_group_name_H-M    P2(1)/c 
 
loop_ 
 _symmetry_equiv_pos_as_xyz 
 'x, y, z' 
 '-x, y+1/2, -z+1/2' 
 '-x, -y, -z' 
 'x, -y-1/2, z-1/2' 
 
_cell_length_a                    12.269(4) 
_cell_length_b                    8.186(3) 
_cell_length_c                    7.594(2) 
_cell_angle_alpha                 90.00 
_cell_angle_beta                  95.895(6) 
_cell_angle_gamma                 90.00 
_cell_volume                      758.7(4) 
_cell_formula_units_Z             2 
_cell_measurement_temperature     293.15 
_cell_measurement_reflns_used     ? 
_cell_measurement_theta_min       2.4867 
_cell_measurement_theta_max       27.4835 
 
_exptl_crystal_description        Prism 
_exptl_crystal_colour             olivine 
_exptl_crystal_size_max           0.1400 
_exptl_crystal_size_mid           0.1200 
_exptl_crystal_size_min           0.0500 
_exptl_crystal_density_meas       ? 
_exptl_crystal_density_diffrn     4.779 
_exptl_crystal_density_method     'not measured' 
_exptl_crystal_F_000              994 
_exptl_absorpt_coefficient_mu     22.140 
_exptl_absorpt_correction_type    Multi-scan 
_exptl_absorpt_correction_T_min   0.058 
_exptl_absorpt_correction_T_max   0.331 
_exptl_absorpt_process_details    ? 
 
_exptl_special_details 
; 
 ? 
; 
 
_diffrn_ambient_temperature       173(2) 
_diffrn_radiation_wavelength      0.71073 
_diffrn_radiation_type            MoK\a 
_diffrn_radiation_source          'fine-focus sealed tube' 
_diffrn_radiation_monochromator   graphite 
_diffrn_measurement_device_type   Mercury70 
_diffrn_measurement_method        CCD_Profile_fitting 
_diffrn_detector_area_resol_mean  ? 
_diffrn_standards_number          ? 
_diffrn_standards_interval_count  ? 
_diffrn_standards_interval_time   ? 
_diffrn_standards_decay_%         ? 
_diffrn_reflns_number             5655 
_diffrn_reflns_av_R_equivalents   0.0341 
_diffrn_reflns_av_sigmaI/netI     0.0338 
_diffrn_reflns_limit_h_min        -15 
_diffrn_reflns_limit_h_max        15 
_diffrn_reflns_limit_k_min        -10 
_diffrn_reflns_limit_k_max        10 
_diffrn_reflns_limit_l_min        -9 
_diffrn_reflns_limit_l_max        6 
_diffrn_reflns_theta_min          3.00 
_diffrn_reflns_theta_max          27.49 
_reflns_number_total              1740 
_reflns_number_gt                 1590 
_reflns_threshold_expression      >2sigma(I) 
 
_computing_data_collection        ? 
_computing_cell_refinement        ? 
_computing_data_reduction         ? 
_computing_structure_solution     'SHELXS-97 (Sheldrick, 1990)' 
_computing_structure_refinement   'SHELXL-97 (Sheldrick, 1997)' 
_computing_molecular_graphics     ? 
_computing_publication_material   ? 
 
_refine_special_details 
; 
 Refinement of F^2^ against ALL reflections.  The weighted R-factor wR and 
 goodness of fit S are based on F^2^, conventional R-factors R are based 
 on F, with F set to zero for negative F^2^. The threshold expression of 
 F^2^ > 2sigma(F^2^) is used only for calculating R-factors(gt) etc. and is 
 not relevant to the choice of reflections for refinement.  R-factors based 
 on F^2^ are statistically about twice as large as those based on F, and R- 
 factors based on ALL data will be even larger. 
; 
 
_refine_ls_structure_factor_coef  Fsqd  
_refine_ls_matrix_type            full 
_refine_ls_weighting_scheme       calc  
_refine_ls_weighting_details 
 'calc w=1/[\s^2^(Fo^2^)+(0.0305P)^2^+0.3570P] where P=(Fo^2^+2Fc^2^)/3' 
_atom_sites_solution_primary      direct 
_atom_sites_solution_secondary    difmap  
_refine_ls_extinction_method      SHELXL 
_refine_ls_extinction_coef        0.0041(3) 
_refine_ls_extinction_expression 
 'Fc^*^=kFc[1+0.001xFc^2^\l^3^/sin(2\q)]^-1/4^' 
_refine_ls_number_reflns          1740 
_refine_ls_number_parameters      129 
_refine_ls_number_restraints      0 
_refine_ls_R_factor_all           0.0264 
_refine_ls_R_factor_gt            0.0222 
_refine_ls_wR_factor_ref          0.0570 
_refine_ls_wR_factor_gt           0.0545 
_refine_ls_goodness_of_fit_ref    1.023 
_refine_ls_restrained_S_all       1.023 
_refine_ls_shift/su_max           0.009 
_refine_ls_shift/su_mean          0.001 
 
loop_ 
 _atom_site_label 
 _atom_site_type_symbol 
 _atom_site_fract_x 
 _atom_site_fract_y 
 _atom_site_fract_z 
 _atom_site_U_iso_or_equiv 
 _atom_site_adp_type 
 _atom_site_occupancy 
 _atom_site_symmetry_multiplicity 
 _atom_site_calc_flag 
 _atom_site_refinement_flags 
 _atom_site_disorder_assembly 
 _atom_site_disorder_group 
Ga Ga 0.17355(3) 0.49344(5) -0.13596(6) 0.00590(12) Uani 1 1 d . . . 
Cu1 Cu 0.5000 1.0000 0.0000 0.00672(16) Uani 1 2 d S . . 
Cu2 Cu 0.37919(4) 0.62153(6) 0.12771(7) 0.00884(13) Uani 1 1 d . . . 
Se1 Se 0.21383(3) 0.90305(5) -0.05223(5) 0.00544(11) Uani 1 1 d . . . 
Se2 Se 0.60640(3) 0.68653(5) 0.18578(5) 0.00555(11) Uani 1 1 d . . . 
Se3 Se -0.04414(3) 0.69701(5) -0.13839(5) 0.00667(12) Uani 1 1 d . . . 
O1 O 0.2523(2) 0.9818(3) 0.1500(4) 0.0122(6) Uani 1 1 d . . . 
O2 O 0.3231(2) 0.9664(3) -0.1524(4) 0.0096(6) Uani 1 1 d . . . 
O3 O 0.2493(2) 0.6997(3) -0.0133(4) 0.0095(6) Uani 1 1 d . . . 
O4 O 0.5004(2) 0.7661(3) 0.0410(4) 0.0080(6) Uani 1 1 d . . . 
O5 O 0.6774(2) 0.5925(3) 0.0354(4) 0.0076(6) Uiso 1 1 d . . . 
O6 O 0.5184(2) 0.5342(3) 0.2422(4) 0.0071(6) Uani 1 1 d . . . 
O7 O 0.0522(2) 0.6097(3) -0.2570(4) 0.0108(6) Uani 1 1 d . . . 
O8 O -0.1131(2) 0.5261(3) -0.0878(4) 0.0083(6) Uani 1 1 d . . . 
O9 O -0.1330(2) 0.7665(3) -0.3081(4) 0.0098(6) Uani 1 1 d . . . 
 
loop_ 
 _atom_site_aniso_label 
 _atom_site_aniso_U_11 
 _atom_site_aniso_U_22 
 _atom_site_aniso_U_33 
 _atom_site_aniso_U_23 
 _atom_site_aniso_U_13 
 _atom_site_aniso_U_12 
Ga 0.0078(2) 0.0076(2) 0.0027(2) 0.00048(16) 0.00257(16) 0.00012(16) 
Cu1 0.0138(3) 0.0050(3) 0.0018(3) 0.0005(3) 0.0031(3) 0.0011(3) 
Cu2 0.0089(2) 0.0112(3) 0.0066(3) 0.0033(2) 0.00121(19) 0.00003(19) 
Se1 0.00747(19) 0.0071(2) 0.00203(19) -0.00002(14) 0.00185(15) 0.00017(14) 
Se2 0.00830(19) 0.0065(2) 0.0022(2) -0.00055(14) 0.00207(15) 0.00015(14) 
Se3 0.00942(19) 0.0084(2) 0.0026(2) 0.00040(15) 0.00251(15) -0.00091(15) 
O1 0.0150(14) 0.0178(16) 0.0044(14) -0.0058(12) 0.0042(12) -0.0058(12) 
O2 0.0145(14) 0.0122(15) 0.0025(14) 0.0004(11) 0.0030(12) -0.0021(12) 
O3 0.0125(13) 0.0027(15) 0.0130(15) 0.0010(11) -0.0008(12) 0.0002(11) 
O4 0.0100(13) 0.0083(14) 0.0058(14) 0.0003(12) 0.0006(11) -0.0003(11) 
O6 0.0067(12) 0.0095(14) 0.0059(13) 0.0020(11) 0.0039(11) -0.0019(11) 
O7 0.0090(12) 0.0183(16) 0.0057(14) 0.0047(12) 0.0039(11) 0.0065(12) 
O8 0.0114(13) 0.0103(14) 0.0037(13) 0.0000(11) 0.0028(11) -0.0037(11) 
O9 0.0143(13) 0.0074(14) 0.0078(14) 0.0036(12) 0.0020(12) 0.0031(11) 
 
_geom_special_details 
; 
 All esds (except the esd in the dihedral angle between two l.s. planes) 
 are estimated using the full covariance matrix.  The cell esds are taken 
 into account individually in the estimation of esds in distances, angles 
 and torsion angles; correlations between esds in cell parameters are only 
 used when they are defined by crystal symmetry.  An approximate (isotropic) 
 treatment of cell esds is used for estimating esds involving l.s. planes. 
; 
 
loop_ 
 _geom_bond_atom_site_label_1 
 _geom_bond_atom_site_label_2 
 _geom_bond_distance 
 _geom_bond_site_symmetry_2 
 _geom_bond_publ_flag 
Ga O7 1.920(3) . ? 
Ga O8 1.929(3) 3_565 ? 
Ga O9 1.959(3) 2_544 ? 
Ga O1 1.985(3) 4_575 ? 
Ga O5 2.033(3) 3_665 ? 
Ga O3 2.099(3) . ? 
Cu1 O4 1.940(3) . ? 
Cu1 O4 1.940(3) 3_675 ? 
Cu1 O6 2.013(3) 4_575 ? 
Cu1 O6 2.013(3) 2_655 ? 
Cu1 O2 2.368(3) 3_675 ? 
Cu1 O2 2.368(3) . ? 
Cu2 O3 1.935(3) . ? 
Cu2 O6 1.969(3) . ? 
Cu2 O2 2.004(3) 4_576 ? 
Cu2 O4 2.060(3) . ? 
Cu2 O5 2.216(3) 3_665 ? 
Cu2 Se2 2.8277(10) . ? 
Se1 O1 1.688(3) . ? 
Se1 O2 1.689(3) . ? 
Se1 O3 1.739(3) . ? 
Se2 O5 1.691(3) . ? 
Se2 O6 1.732(3) . ? 
Se2 O4 1.741(3) . ? 
Se3 O9 1.698(3) . ? 
Se3 O8 1.700(3) . ? 
Se3 O7 1.714(3) . ? 
O1 Ga 1.985(3) 4_576 ? 
O2 Cu2 2.004(3) 4_575 ? 
O5 Ga 2.033(3) 3_665 ? 
O5 Cu2 2.216(3) 3_665 ? 
O6 Cu1 2.013(3) 2_645 ? 
O8 Ga 1.929(3) 3_565 ? 
O9 Ga 1.959(3) 2_554 ? 
 
loop_ 
 _geom_angle_atom_site_label_1 
 _geom_angle_atom_site_label_2 
 _geom_angle_atom_site_label_3 
 _geom_angle 
 _geom_angle_site_symmetry_1 
 _geom_angle_site_symmetry_3 
 _geom_angle_publ_flag 
O7 Ga O8 96.50(12) . 3_565 ? 
O7 Ga O9 101.47(12) . 2_544 ? 
O8 Ga O9 90.02(11) 3_565 2_544 ? 
O7 Ga O1 88.64(12) . 4_575 ? 
O8 Ga O1 173.37(12) 3_565 4_575 ? 
O9 Ga O1 93.06(12) 2_544 4_575 ? 
O7 Ga O5 167.03(11) . 3_665 ? 
O8 Ga O5 93.04(12) 3_565 3_665 ? 
O9 Ga O5 87.26(11) 2_544 3_665 ? 
O1 Ga O5 81.26(11) 4_575 3_665 ? 
O7 Ga O3 95.76(12) . . ? 
O8 Ga O3 82.44(11) 3_565 . ? 
O9 Ga O3 161.88(12) 2_544 . ? 
O1 Ga O3 92.91(12) 4_575 . ? 
O5 Ga O3 76.77(11) 3_665 . ? 
O4 Cu1 O4 180.00(3) . 3_675 ? 
O4 Cu1 O6 91.15(11) . 4_575 ? 
O4 Cu1 O6 88.85(11) 3_675 4_575 ? 
O4 Cu1 O6 88.85(11) . 2_655 ? 
O4 Cu1 O6 91.15(11) 3_675 2_655 ? 
O6 Cu1 O6 180.0 4_575 2_655 ? 
O4 Cu1 O2 92.82(10) . 3_675 ? 
O4 Cu1 O2 87.18(10) 3_675 3_675 ? 
O6 Cu1 O2 107.63(10) 4_575 3_675 ? 
O6 Cu1 O2 72.37(10) 2_655 3_675 ? 
O4 Cu1 O2 87.18(10) . . ? 
O4 Cu1 O2 92.82(10) 3_675 . ? 
O6 Cu1 O2 72.37(10) 4_575 . ? 
O6 Cu1 O2 107.63(10) 2_655 . ? 
O2 Cu1 O2 180.00(13) 3_675 . ? 
O3 Cu2 O6 172.65(12) . . ? 
O3 Cu2 O2 104.25(12) . 4_576 ? 
O6 Cu2 O2 81.83(11) . 4_576 ? 
O3 Cu2 O4 102.33(11) . . ? 
O6 Cu2 O4 74.23(11) . . ? 
O2 Cu2 O4 142.51(11) 4_576 . ? 
O3 Cu2 O5 76.06(11) . 3_665 ? 
O6 Cu2 O5 99.65(11) . 3_665 ? 
O2 Cu2 O5 93.85(11) 4_576 3_665 ? 
O4 Cu2 O5 118.06(11) . 3_665 ? 
O3 Cu2 Se2 140.06(9) . . ? 
O6 Cu2 Se2 37.18(8) . . ? 
O2 Cu2 Se2 110.79(8) 4_576 . ? 
O4 Cu2 Se2 37.78(8) . . ? 
O5 Cu2 Se2 118.90(7) 3_665 . ? 
O1 Se1 O2 97.56(14) . . ? 
O1 Se1 O3 99.75(14) . . ? 
O2 Se1 O3 100.03(13) . . ? 
O5 Se2 O6 102.52(13) . . ? 
O5 Se2 O4 98.46(13) . . ? 
O6 Se2 O4 88.91(13) . . ? 
O5 Se2 Cu2 112.14(9) . . ? 
O6 Se2 Cu2 43.39(9) . . ? 
O4 Se2 Cu2 46.46(9) . . ? 
O9 Se3 O8 98.74(14) . . ? 
O9 Se3 O7 99.45(14) . . ? 
O8 Se3 O7 99.30(14) . . ? 
Se1 O1 Ga 132.07(16) . 4_576 ? 
Se1 O2 Cu2 128.38(16) . 4_575 ? 
Se1 O2 Cu1 123.06(14) . . ? 
Cu2 O2 Cu1 94.19(11) 4_575 . ? 
Se1 O3 Cu2 126.04(16) . . ? 
Se1 O3 Ga 127.08(16) . . ? 
Cu2 O3 Ga 106.37(12) . . ? 
Se2 O4 Cu1 117.37(14) . . ? 
Se2 O4 Cu2 95.76(13) . . ? 
Cu1 O4 Cu2 128.93(14) . . ? 
Se2 O5 Ga 114.18(15) . 3_665 ? 
Se2 O5 Cu2 125.73(14) . 3_665 ? 
Ga O5 Cu2 98.90(11) 3_665 3_665 ? 
Se2 O6 Cu2 99.43(13) . . ? 
Se2 O6 Cu1 118.40(15) . 2_645 ? 
Cu2 O6 Cu1 107.55(12) . 2_645 ? 
Se3 O7 Ga 119.84(16) . . ? 
Se3 O8 Ga 120.85(15) . 3_565 ? 
Se3 O9 Ga 127.69(16) . 2_554 ? 
 
_diffrn_measured_fraction_theta_max    0.999 
_diffrn_reflns_theta_full              27.49 
_diffrn_measured_fraction_theta_full   0.999 
_refine_diff_density_max    0.924 
_refine_diff_density_min   -0.787 
_refine_diff_density_rms    0.188 

#===end

 
data_Cu3In2Se6O18 
 
_audit_creation_method            SHELXL-97 
_chemical_name_systematic 
; 
 ? 
; 
_chemical_name_common             ? 
_chemical_melting_point           ? 
_chemical_formula_moiety          ? 
_chemical_formula_sum 
 'Cu3 In2 O18 Se6' 
_chemical_formula_weight          1182.02 
 
loop_ 
 _atom_type_symbol 
 _atom_type_description 
 _atom_type_scat_dispersion_real 
 _atom_type_scat_dispersion_imag 
 _atom_type_scat_source 
 'Cu'  'Cu'   0.3201   1.2651 
 'International Tables Vol C Tables 4.2.6.8 and 6.1.1.4' 
 'In'  'In'  -0.7276   1.3100 
 'International Tables Vol C Tables 4.2.6.8 and 6.1.1.4' 
 'O'  'O'   0.0106   0.0060 
 'International Tables Vol C Tables 4.2.6.8 and 6.1.1.4' 
 'Se'  'Se'  -0.0929   2.2259 
 'International Tables Vol C Tables 4.2.6.8 and 6.1.1.4' 
 
_symmetry_cell_setting            monoclinic 
_symmetry_space_group_name_H-M    P2(1)/c    
 
loop_ 
 _symmetry_equiv_pos_as_xyz 
 'x, y, z' 
 '-x, y+1/2, -z+1/2' 
 '-x, -y, -z' 
 'x, -y-1/2, z-1/2' 
 
_cell_length_a                    5.4927(15) 
_cell_length_b                    19.278(5) 
_cell_length_c                    9.2318(18) 
_cell_angle_alpha                 90.00 
_cell_angle_beta                  123.432(11) 
_cell_angle_gamma                 90.00 
_cell_volume                      815.8(3) 
_cell_formula_units_Z             2 
_cell_measurement_temperature     293(2) 
_cell_measurement_reflns_used     ? 
_cell_measurement_theta_min       3.1701  
_cell_measurement_theta_max       27.4719 
 
_exptl_crystal_description        Prism     
_exptl_crystal_colour             turquoise 
_exptl_crystal_size_max           0.12      
_exptl_crystal_size_mid           0.10      
_exptl_crystal_size_min           0.08      
_exptl_crystal_density_meas       ? 
_exptl_crystal_density_diffrn     4.812 
_exptl_crystal_density_method     'not measured' 
_exptl_crystal_F_000              1066 
_exptl_absorpt_coefficient_mu     20.114 
_exptl_absorpt_correction_type    Multi-scan 
_exptl_absorpt_correction_T_min   0.486         
_exptl_absorpt_correction_T_max   1.0000         
_exptl_absorpt_process_details    ? 
 
_exptl_special_details 
; 
 ? 
; 
 
_diffrn_ambient_temperature       293(2) 
_diffrn_radiation_wavelength      0.71073 
_diffrn_radiation_type            MoK\a 
_diffrn_radiation_source          'fine-focus sealed tube' 
_diffrn_radiation_monochromator   graphite 
_diffrn_measurement_device_type   Mercury70           
_diffrn_measurement_method        CCD_Profile_fitting 
_diffrn_detector_area_resol_mean  ? 
_diffrn_standards_number          ? 
_diffrn_standards_interval_count  ? 
_diffrn_standards_interval_time   ? 
_diffrn_standards_decay_%         ? 
_diffrn_reflns_number             6332 
_diffrn_reflns_av_R_equivalents   0.0333 
_diffrn_reflns_av_sigmaI/netI     0.0326 
_diffrn_reflns_limit_h_min        -7 
_diffrn_reflns_limit_h_max        7 
_diffrn_reflns_limit_k_min        -13 
_diffrn_reflns_limit_k_max        25 
_diffrn_reflns_limit_l_min        -11 
_diffrn_reflns_limit_l_max        11 
_diffrn_reflns_theta_min          2.85 
_diffrn_reflns_theta_max          27.47 
_reflns_number_total              1853 
_reflns_number_gt                 1722 
_reflns_threshold_expression      >2sigma(I) 
 
_computing_data_collection        ? 
_computing_cell_refinement        ? 
_computing_data_reduction         ? 
_computing_structure_solution     'SHELXS-97 (Sheldrick, 1990)' 
_computing_structure_refinement   'SHELXL-97 (Sheldrick, 1997)' 
_computing_molecular_graphics     ? 
_computing_publication_material   ? 
 
_refine_special_details 
; 
 Refinement of F^2^ against ALL reflections.  The weighted R-factor wR and 
 goodness of fit S are based on F^2^, conventional R-factors R are based 
 on F, with F set to zero for negative F^2^. The threshold expression of 
 F^2^ > 2sigma(F^2^) is used only for calculating R-factors(gt) etc. and is 
 not relevant to the choice of reflections for refinement.  R-factors based 
 on F^2^ are statistically about twice as large as those based on F, and R- 
 factors based on ALL data will be even larger. 
; 
 
_refine_ls_structure_factor_coef  Fsqd  
_refine_ls_matrix_type            full 
_refine_ls_weighting_scheme       calc  
_refine_ls_weighting_details 
 'calc w=1/[\s^2^(Fo^2^)+(0.0276P)^2^+0.0948P] where P=(Fo^2^+2Fc^2^)/3' 
_atom_sites_solution_primary      direct 
_atom_sites_solution_secondary    difmap 
_refine_ls_extinction_method      none 
_refine_ls_extinction_coef        ? 
_refine_ls_number_reflns          1853 
_refine_ls_number_parameters      133 
_refine_ls_number_restraints      0 
_refine_ls_R_factor_all           0.0250 
_refine_ls_R_factor_gt            0.0224 
_refine_ls_wR_factor_ref          0.0547 
_refine_ls_wR_factor_gt           0.0534 
_refine_ls_goodness_of_fit_ref    1.070 
_refine_ls_restrained_S_all       1.070 
_refine_ls_shift/su_max           0.000 
_refine_ls_shift/su_mean          0.000 
 
loop_ 
 _atom_site_label 
 _atom_site_type_symbol 
 _atom_site_fract_x 
 _atom_site_fract_y 
 _atom_site_fract_z 
 _atom_site_U_iso_or_equiv 
 _atom_site_adp_type 
 _atom_site_occupancy 
 _atom_site_symmetry_multiplicity 
 _atom_site_calc_flag 
 _atom_site_refinement_flags 
 _atom_site_disorder_assembly 
 _atom_site_disorder_group 
In1 In 0.26967(6) -0.154197(15) 0.24446(4) 0.00622(9) Uani 1 1 d . . . 
Cu1 Cu 0.0000 0.0000 0.0000 0.00733(16) Uani 1 2 d S . . 
Cu2 Cu 0.28980(11) -0.01184(3) 0.67379(7) 0.01199(14) Uani 1 1 d . . . 
Se1 Se -0.04337(9) -0.22364(2) 0.44220(5) 0.00971(11) Uani 1 1 d . . . 
Se2 Se -0.43143(9) -0.11389(2) 0.02338(5) 0.00561(11) Uani 1 1 d . . . 
Se3 Se 0.76595(9) -0.09272(2) 0.64595(5) 0.00634(11) Uani 1 1 d . . . 
O1 O -0.4058(7) -0.23248(17) 0.3517(4) 0.0214(8) Uani 1 1 d . . . 
O2 O 0.0655(7) -0.30744(16) 0.4860(4) 0.0126(7) Uani 1 1 d . . . 
O3 O -0.0371(6) -0.21217(16) 0.2619(4) 0.0122(7) Uani 1 1 d . . . 
O4 O -0.0918(6) -0.07568(15) 0.1058(3) 0.0077(6) Uani 1 1 d . . . 
O5 O -0.6697(6) -0.05805(17) -0.1299(4) 0.0138(7) Uani 1 1 d . . . 
O6 O 0.4135(7) -0.10394(17) 0.4857(4) 0.0128(7) Uani 1 1 d . . . 
O7 O 0.8781(6) -0.03992(16) 0.5429(4) 0.0115(7) Uani 1 1 d . . . 
O8 O 0.7085(6) -0.03356(16) 0.7633(3) 0.0097(6) Uani 1 1 d . . . 
O9 O 0.5191(6) -0.08804(15) 0.1840(4) 0.0083(6) Uani 1 1 d . . . 
 
loop_ 
 _atom_site_aniso_label 
 _atom_site_aniso_U_11 
 _atom_site_aniso_U_22 
 _atom_site_aniso_U_33 
 _atom_site_aniso_U_23 
 _atom_site_aniso_U_13 
 _atom_site_aniso_U_12 
In1 0.00617(15) 0.00518(16) 0.00654(16) 0.00021(11) 0.00300(12) -0.00057(10) 
Cu1 0.0087(3) 0.0056(4) 0.0049(3) 0.0001(3) 0.0020(3) -0.0034(3) 
Cu2 0.0059(2) 0.0177(3) 0.0081(3) 0.0064(2) 0.0012(2) -0.0020(2) 
Se1 0.0130(2) 0.0060(2) 0.0123(2) 0.00245(17) 0.00824(18) 0.00201(17) 
Se2 0.0053(2) 0.0051(2) 0.0056(2) 0.00006(15) 0.00247(16) -0.00037(15) 
Se3 0.0075(2) 0.0048(2) 0.0064(2) -0.00029(16) 0.00359(17) -0.00085(16) 
O1 0.0162(16) 0.0148(17) 0.040(2) 0.0170(16) 0.0199(16) 0.0114(14) 
O2 0.0183(17) 0.0083(15) 0.0130(15) 0.0039(13) 0.0097(14) 0.0075(13) 
O3 0.0135(15) 0.0131(16) 0.0114(15) 0.0003(13) 0.0077(13) -0.0041(13) 
O4 0.0062(14) 0.0063(14) 0.0081(14) 0.0021(12) 0.0023(12) -0.0006(12) 
O5 0.0088(15) 0.0176(17) 0.0117(16) 0.0095(13) 0.0036(13) 0.0018(13) 
O6 0.0104(15) 0.0179(17) 0.0095(15) -0.0076(13) 0.0050(13) -0.0069(13) 
O7 0.0059(14) 0.0172(17) 0.0069(14) 0.0038(13) 0.0008(12) -0.0041(12) 
O8 0.0090(14) 0.0134(17) 0.0061(14) -0.0047(12) 0.0038(12) -0.0020(12) 
O9 0.0134(15) 0.0076(15) 0.0081(14) -0.0042(12) 0.0086(12) -0.0040(12) 
 
_geom_special_details 
; 
 All esds (except the esd in the dihedral angle between two l.s. planes) 
 are estimated using the full covariance matrix.  The cell esds are taken 
 into account individually in the estimation of esds in distances, angles 
 and torsion angles; correlations between esds in cell parameters are only 
 used when they are defined by crystal symmetry.  An approximate (isotropic) 
 treatment of cell esds is used for estimating esds involving l.s. planes. 
; 
 
loop_ 
 _geom_bond_atom_site_label_1 
 _geom_bond_atom_site_label_2 
 _geom_bond_distance 
 _geom_bond_site_symmetry_2 
 _geom_bond_publ_flag 
In1 O3 2.101(3) . ? 
In1 O1 2.119(3) 1_655 ? 
In1 O2 2.133(3) 4 ? 
In1 O6 2.141(3) . ? 
In1 O9 2.158(3) . ? 
In1 O4 2.252(3) . ? 
Cu1 O4 1.970(3) 3 ? 
Cu1 O4 1.970(3) . ? 
Cu1 O8 1.975(3) 3_656 ? 
Cu1 O8 1.975(3) 1_454 ? 
Cu2 O5 1.919(3) 1_656 ? 
Cu2 O7 1.953(3) 3_656 ? 
Cu2 O7 1.964(3) 1_455 ? 
Cu2 O8 2.013(3) . ? 
Cu2 O9 2.239(3) 3_656 ? 
Se1 O1 1.690(3) . ? 
Se1 O2 1.692(3) . ? 
Se1 O3 1.698(3) . ? 
Se2 O5 1.683(3) . ? 
Se2 O9 1.722(3) 1_455 ? 
Se2 O4 1.743(3) . ? 
Se3 O6 1.681(3) . ? 
Se3 O8 1.718(3) . ? 
Se3 O7 1.722(3) . ? 
O1 In1 2.119(3) 1_455 ? 
O2 In1 2.133(3) 4_556 ? 
O5 Cu2 1.919(3) 1_454 ? 
O7 Cu2 1.953(3) 3_656 ? 
O7 Cu2 1.964(3) 1_655 ? 
O8 Cu1 1.975(3) 1_656 ? 
O9 Se2 1.722(3) 1_655 ? 
O9 Cu2 2.239(3) 3_656 ? 
 
loop_ 
 _geom_angle_atom_site_label_1 
 _geom_angle_atom_site_label_2 
 _geom_angle_atom_site_label_3 
 _geom_angle 
 _geom_angle_site_symmetry_1 
 _geom_angle_site_symmetry_3 
 _geom_angle_publ_flag 
O3 In1 O1 95.11(12) . 1_655 ? 
O3 In1 O2 87.23(11) . 4 ? 
O1 In1 O2 93.68(13) 1_655 4 ? 
O3 In1 O6 90.75(11) . . ? 
O1 In1 O6 95.91(13) 1_655 . ? 
O2 In1 O6 170.34(12) 4 . ? 
O3 In1 O9 169.90(11) . . ? 
O1 In1 O9 92.93(12) 1_655 . ? 
O2 In1 O9 86.16(11) 4 . ? 
O6 In1 O9 94.50(11) . . ? 
O3 In1 O4 84.72(11) . . ? 
O1 In1 O4 174.57(12) 1_655 . ? 
O2 In1 O4 80.89(11) 4 . ? 
O6 In1 O4 89.52(11) . . ? 
O9 In1 O4 86.70(11) . . ? 
O4 Cu1 O4 180.00(11) 3 . ? 
O4 Cu1 O8 91.88(12) 3 3_656 ? 
O4 Cu1 O8 88.12(12) . 3_656 ? 
O4 Cu1 O8 88.12(12) 3 1_454 ? 
O4 Cu1 O8 91.88(12) . 1_454 ? 
O8 Cu1 O8 180.0(2) 3_656 1_454 ? 
O5 Cu2 O7 161.44(13) 1_656 3_656 ? 
O5 Cu2 O7 87.03(12) 1_656 1_455 ? 
O7 Cu2 O7 77.10(14) 3_656 1_455 ? 
O5 Cu2 O8 90.21(12) 1_656 . ? 
O7 Cu2 O8 108.35(12) 3_656 . ? 
O7 Cu2 O8 149.66(13) 1_455 . ? 
O5 Cu2 O9 94.16(12) 1_656 3_656 ? 
O7 Cu2 O9 88.02(12) 3_656 3_656 ? 
O7 Cu2 O9 127.35(13) 1_455 3_656 ? 
O8 Cu2 O9 82.98(12) . 3_656 ? 
O1 Se1 O2 100.77(15) . . ? 
O1 Se1 O3 100.54(16) . . ? 
O2 Se1 O3 99.38(14) . . ? 
O5 Se2 O9 96.92(15) . 1_455 ? 
O5 Se2 O4 104.24(14) . . ? 
O9 Se2 O4 98.07(13) 1_455 . ? 
O6 Se3 O8 96.76(14) . . ? 
O6 Se3 O7 100.30(14) . . ? 
O8 Se3 O7 101.65(15) . . ? 
Se1 O1 In1 128.14(18) . 1_455 ? 
Se1 O2 In1 119.79(16) . 4_556 ? 
Se1 O3 In1 126.48(16) . . ? 
Se2 O4 Cu1 126.98(15) . . ? 
Se2 O4 In1 111.13(14) . . ? 
Cu1 O4 In1 113.16(13) . . ? 
Se2 O5 Cu2 136.28(19) . 1_454 ? 
Se3 O6 In1 124.03(17) . . ? 
Se3 O7 Cu2 139.18(17) . 3_656 ? 
Se3 O7 Cu2 117.67(15) . 1_655 ? 
Cu2 O7 Cu2 102.90(14) 3_656 1_655 ? 
Se3 O8 Cu1 126.61(16) . 1_656 ? 
Se3 O8 Cu2 116.38(14) . . ? 
Cu1 O8 Cu2 115.64(14) 1_656 . ? 
Se2 O9 In1 118.39(15) 1_655 . ? 
Se2 O9 Cu2 120.56(15) 1_655 3_656 ? 
In1 O9 Cu2 121.05(13) . 3_656 ? 
 
_diffrn_measured_fraction_theta_max    0.999 
_diffrn_reflns_theta_full              27.47 
_diffrn_measured_fraction_theta_full   0.999 
_refine_diff_density_max    1.382 
_refine_diff_density_min   -1.054 
_refine_diff_density_rms    0.218 
